# Supplementary material for: An interlocked flexible piezoresistive sensor with 3D micropyramidal structures for electronic skin applications
Source: Royal Society of Chemistry journal article supplement (doi:10.1039/c8sm00897c), 2018-01-01
Supplement: c8sm00897c1.pdf [file c8sm00897c1.pdf]

## Supporting Information

### **An Interlocked Flexible Piezoresistive Sensor with 3D Micropyramidal Structures for Electronic Skin Applications**

N. Khalili<sup>a</sup>, Xuechen Shen<sup>a</sup>, and H. E. Naguib<sup>a,b,c</sup>

<sup>a</sup>Department of Mechanical and Industrial Engineering

University of Toronto, 5 King's College Road, Toronto, Ontario, Canada, M5S 3G8

<sup>b</sup>Department of Materials Science and Engineering

University of Toronto, 27 King's College Road, Toronto, Ontario, Canada, M5S 1A1

<sup>c</sup>Institute of Biomaterials and Biomedical Engineering

University of Toronto, 164 College Street, Toronto, Ontario, Canada, M5S 3G9

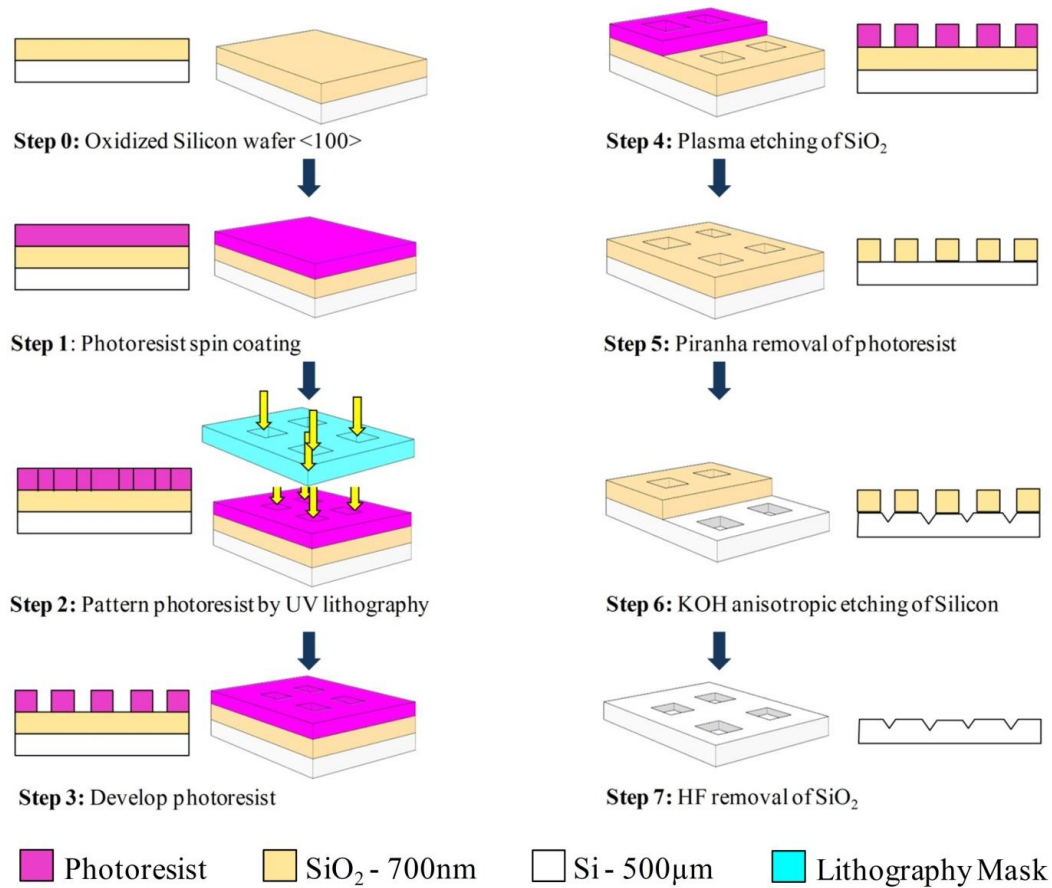

**Figure S1.** Schematic fabrication process of the negative silicon mold to shape the pyramidal microstructures with varying height and pitch sizes. The change in the pitch can be generated using different masks whereas height difference can be achieved by varying the dry etching time of the silicon wafer.

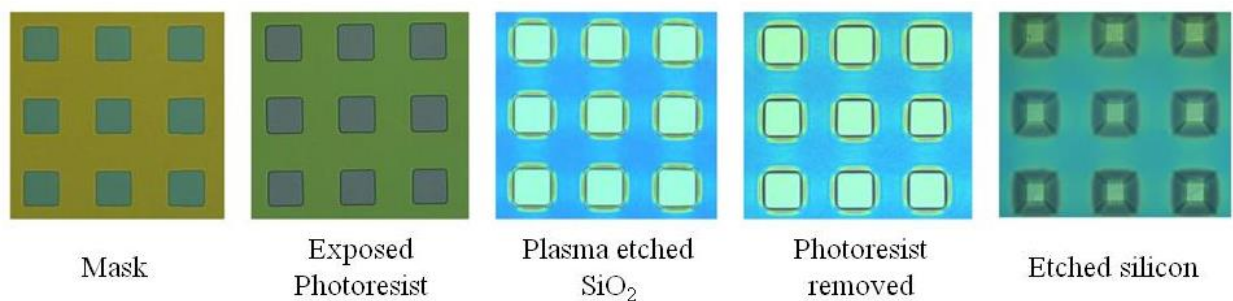

**Figure S2.** Optical images of the mold fabrication process

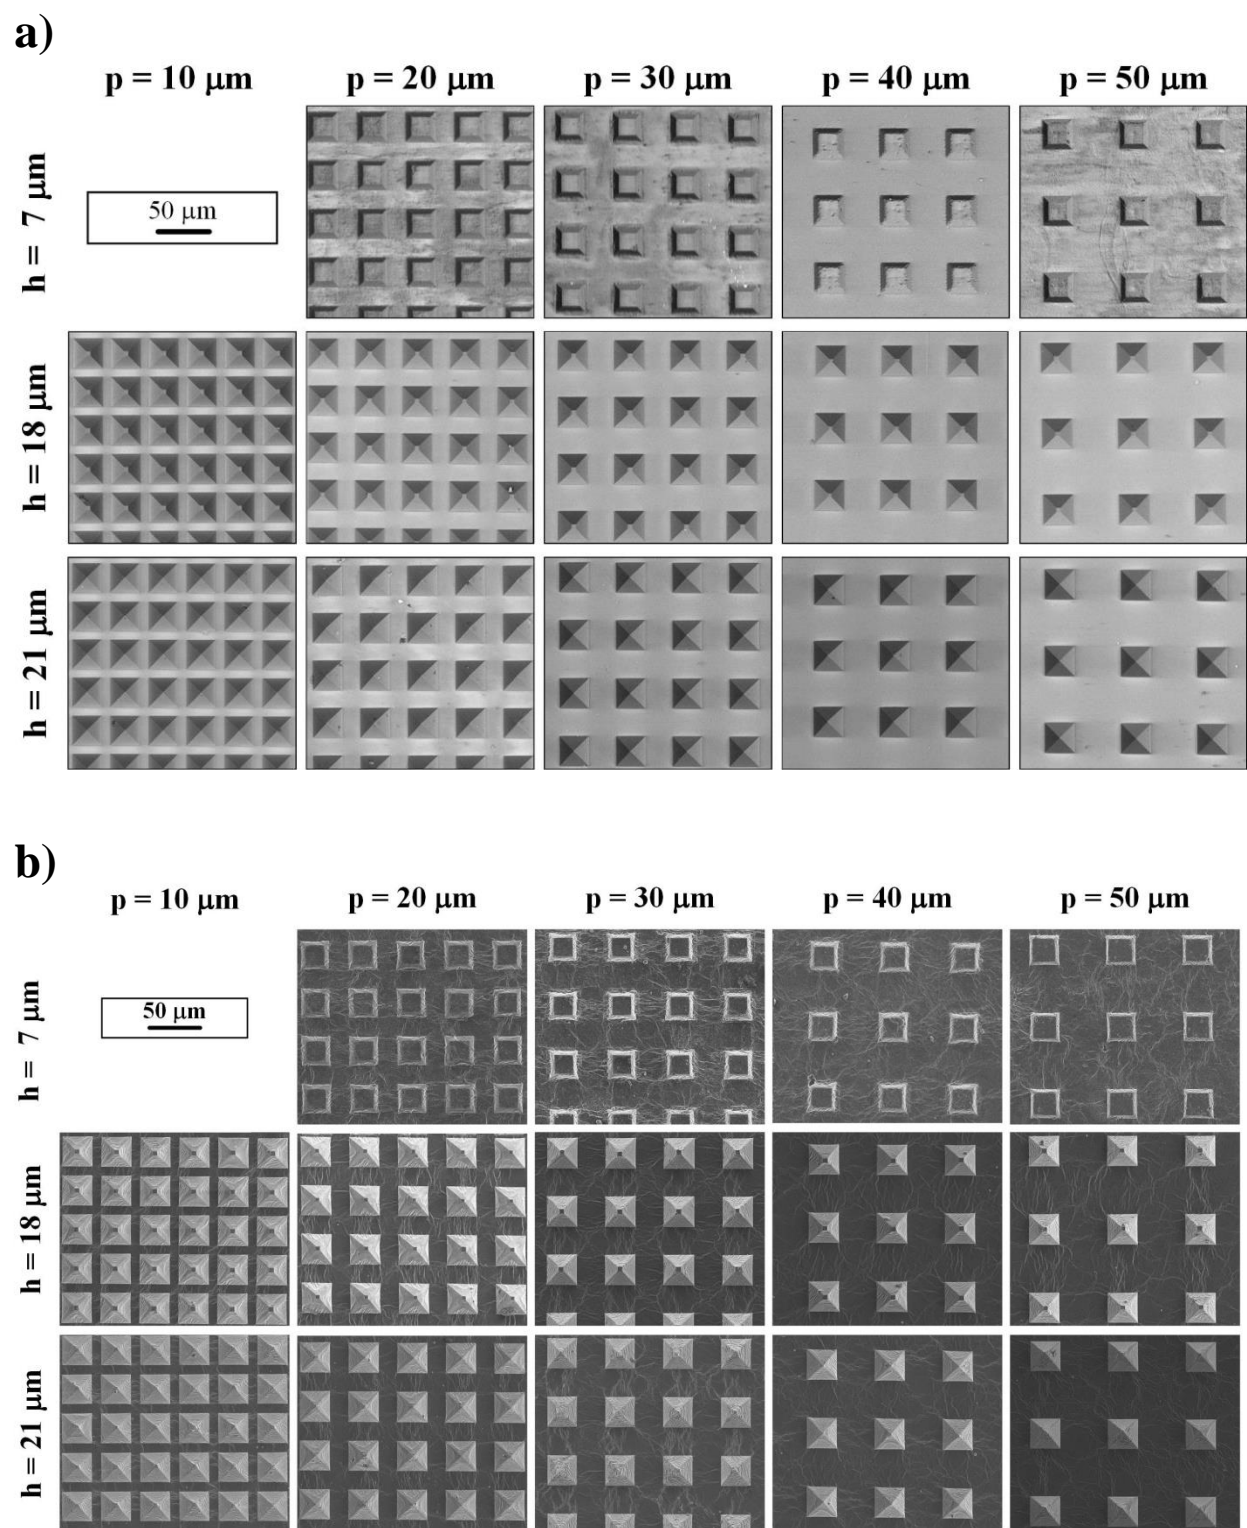

**Figure S3.** SEM micrographs of a) uncoated and b) coated micropyramidal PDMS substrates with varying height and pitch size.

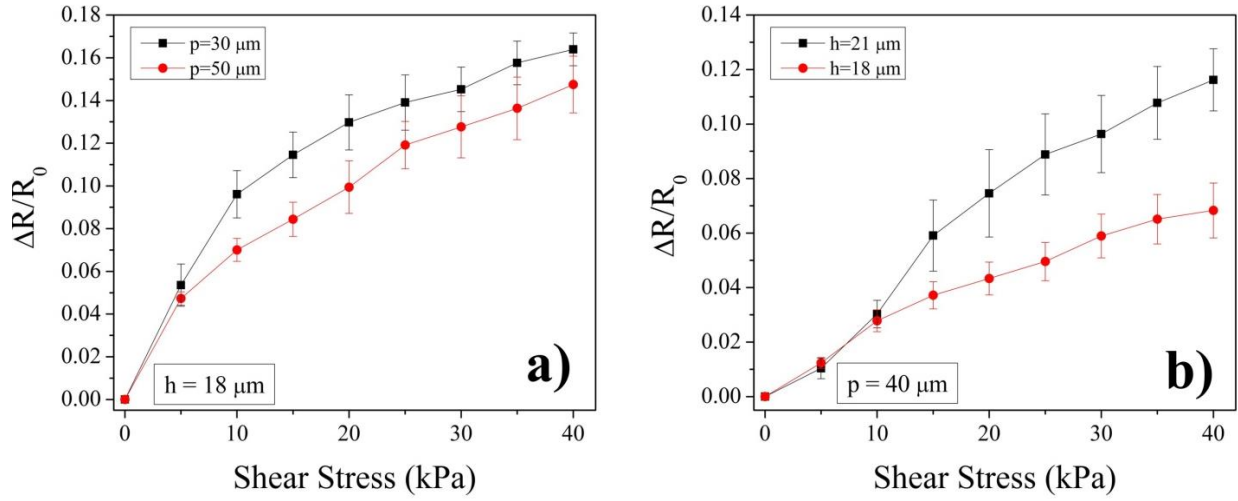

**Figure S4.** The piezoresistive response of the interlocked sensors to a shear stress loading ranging from 0 to 40 kPa for a)  $h = 18 \mu\text{m}$  and  $p = 30, 50 \mu\text{m}$  and b)  $p = 40 \mu\text{m}$  and  $h = 18, 21 \mu\text{m}$ .

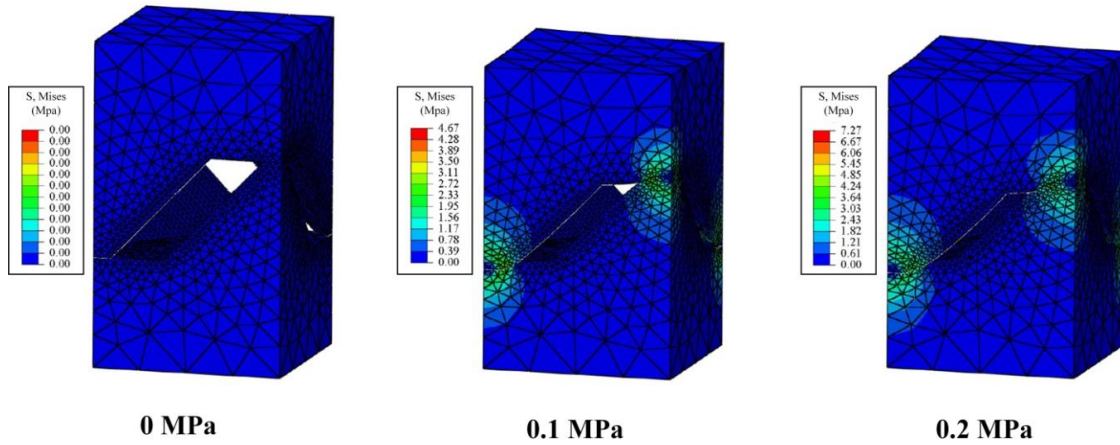

**Figure S5.** The deformed unit cell used in the performed finite element analysis. The stress concentration regions can be observed under different applied loads.

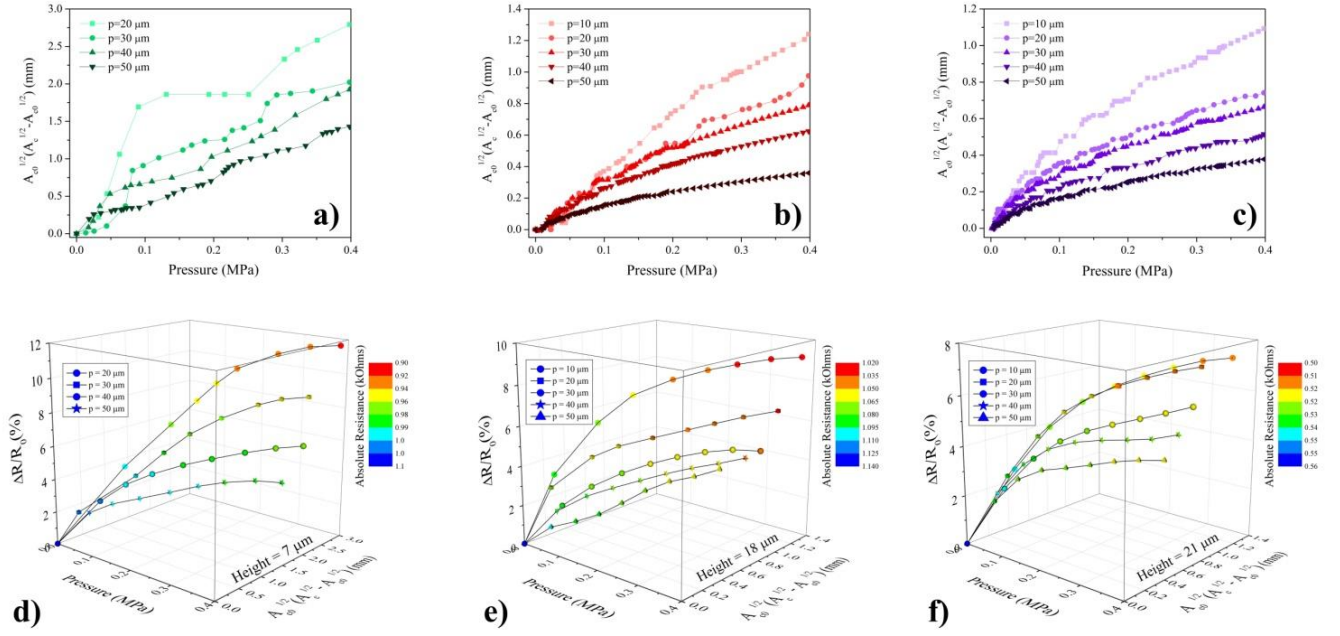

**Figure S6.** Change of  $\sqrt{A_{c0}}(\sqrt{A_c} - \sqrt{A_{c0}})$  in response to compressive stress ranging from 0 to 0.4 MPa for different height and pitch sizes: a)  $h = 7 \mu\text{m}$ , b)  $h = 18 \mu\text{m}$ , and c)  $h = 21 \mu\text{m}$ . The relative and absolute resistance change vs. the relative contact area change for d)  $h = 7 \mu\text{m}$ , e)  $h = 18 \mu\text{m}$ , and f)  $h = 21 \mu\text{m}$ .
